# Supplementary material for: Early malaria infection, dysregulation of angiogenesis, metabolism and inflammation across pregnancy, and risk of preterm birth in Malawi: A cohort study
Source: PubMed Central journal article supplement (PMC6772002; doi:10.1371/journal.pmed.1002914), 2019-10-01
Supplement: pmed.1002914.s003.pdf [file pmed.1002914.s003.pdf]

**S1 Table.** Characteristics of the assays used for marker analysis. CRP and IL-18BP were analyzed by ELISA, and the other mediators were analyzed by Luminex. A control plasma sample was plated in duplicate on each plate run and the % Coefficient of Variation (CVs) are reported.

| Marker    | Lower Limit | Upper Limit | Mean % CV of Control Plasma |
|-----------|-------------|-------------|-----------------------------|
| sTNFR2    | 31.7 pg/mL  | 46.3 ng/mL  | 7                           |
| Angptl3   | 578 pg/mL   | 843 ng/mL   | 6                           |
| sEndoglin | 121 pg/mL   | 177 ng/mL   | 4                           |
| sFlt-1    | 24.0 pg/mL  | 35.1 ng/mL  | 7                           |
| Leptin    | 168 pg/mL   | 245 ng/mL   | 3                           |
| PIGF      | 4.0 pg/mL   | 5780 pg/mL  | 8                           |
| CHI3L1    | 4.60 ng/mL  | 2237 ng/mL  | 17                          |
| sICAM-1   | 30.7 ng/mL  | 44.7 mg/mL  | 10                          |
| CRP       | 391 ng/mL   | 105 mg/mL   | 26                          |
| IL-18BP   | 1.88 ng/mL  | 252 ng/mL   | 17                          |
