# Supplementary material for: Early malaria infection, dysregulation of angiogenesis, metabolism and inflammation across pregnancy, and risk of preterm birth in Malawi: A cohort study
Source: PubMed Central journal article supplement (PMC6772002; doi:10.1371/journal.pmed.1002914), 2019-10-01
Supplement: pmed.1002914.s008.pdf [file pmed.1002914.s008.pdf]

**S6 Table.** Multivariate Linear Mixed Effects Modeling comparing the null model to the addition of malaria status at Visit 1 with an interaction term assessing gestational age.

| <b>Mediator</b> | <b>Model</b>                | <b>AIC</b> | <b>BIC</b> | $\chi^2$ | <b>Chi Df</b> | <b>P value</b>   |
|-----------------|-----------------------------|------------|------------|----------|---------------|------------------|
| <b>sEng</b>     | Null model                  | 4836.1     | 4932.9     |          |               |                  |
|                 | Model with malaria term     | 4822.9     | 4925.8     | 15.18    | 1             | <b>&lt;0.001</b> |
|                 | Model with interaction term | 4788.7     | 4903.6     | 38.26    | 2             | <b>&lt;0.001</b> |
| <b>PlGF</b>     | Null model                  | 7227.4     | 7324.2     |          |               |                  |
|                 | Model with malaria term     | 7229.1     | 7332.0     | 0.29     | 1             | 0.593            |
|                 | Model with interaction term | 7230.2     | 7345.2     | 2.89     | 2             | 0.236            |
| <b>sFlt-1</b>   | Null model                  | 4063.5     | 4160.3     |          |               |                  |
|                 | Model with malaria term     | 4065.5     | 4168.4     | 0.009    | 1             | 0.925            |
|                 | Model with interaction term | 4068.4     | 4183.4     | 1.09     | 2             | 0.580            |
| <b>Angptl3</b>  | Null model                  | 6519.1     | 6615.9     |          |               |                  |
|                 | Model with malaria term     | 6520.9     | 6623.8     | 0.167    | 1             | 0.683            |
|                 | Model with interaction term | 6511.6     | 6626.6     | 13.29    | 2             | <b>0.001</b>     |
| <b>Leptin</b>   | Null model                  | 6047.2     | 6144.0     |          |               |                  |
|                 | Model with malaria term     | 6048.9     | 6151.8     | 0.29     | 1             | 0.593            |
|                 | Model with interaction term | 6039.8     | 6154.7     | 13.16    | 2             | <b>0.001</b>     |
| <b>sICAM-1</b>  | Null model                  | 8112.6     | 8209.5     |          |               |                  |
|                 | Model with malaria term     | 8114.6     | 8217.5     | 0.0016   | 1             | 0.968            |
|                 | Model with interaction term | 8077.9     | 8192.9     | 40.75    | 2             | <b>&lt;0.001</b> |
| <b>CRP</b>      | Null model                  | 9435       | 9531.1     |          |               |                  |
|                 | Model with malaria term     | 9387.4     | 9489.5     | 49.59    | 1             | <b>&lt;0.001</b> |
|                 | Model with interaction term | 9291.7     | 9399.8     | 99.0     | 1             | <b>&lt;0.001</b> |
| <b>CHI3L1</b>   | Null model                  | 7286.5     | 7383.3     |          |               |                  |
|                 | Model with malaria term     | 7288.5     | 7391.4     | 0.0087   | 1             | 0.926            |
|                 | Model with interaction term | 7270.6     | 7385.6     | 21.93    | 2             | <b>&lt;0.001</b> |
| <b>sTNFRII</b>  | Null model                  | 5883.3     | 5980.2     |          |               |                  |
|                 | Model with malaria term     | 5859       | 5961.8     | 26.38    | 1             | <b>&lt;0.001</b> |
|                 | Model with interaction term | 5653.8     | 5768.8     | 209.18   | 2             | <b>&lt;0.001</b> |
| <b>IL-18BP</b>  | Null model                  | 4282.3     | 4379.2     |          |               |                  |
|                 | Model with malaria term     | 4248       | 4350.9     | 36.32    | 1             | <b>&lt;0.001</b> |
|                 | Model with interaction term | 4207.3     | 4322.3     | 44.70    | 2             | <b>&lt;0.001</b> |
