# Supplementary material for: Early malaria infection, dysregulation of angiogenesis, metabolism and inflammation across pregnancy, and risk of preterm birth in Malawi: A cohort study
Source: PubMed Central journal article supplement (PMC6772002; doi:10.1371/journal.pmed.1002914), 2019-10-01
Supplement: pmed.1002914.s011.pdf [file pmed.1002914.s011.pdf]

**S9 Table.** Multivariate Linear Mixed Effects Modeling comparing the null model to the addition of malaria status at Visit 1 with an interaction term assessing gestational age, primigravids only.

| <b>Mediator</b> | <b>Model</b>                | <b>AIC</b> | <b>BIC</b> | <b><math>\chi^2</math></b> | <b>Chi Df</b> | <b>P value</b>   |
|-----------------|-----------------------------|------------|------------|----------------------------|---------------|------------------|
| <b>sEng</b>     | Null model                  | 1948.4     | 2022.9     |                            |               |                  |
|                 | Model with malaria term     | 1932.1     | 2011.6     | 18.28                      | 1             | <b>&lt;0.001</b> |
|                 | Model with interaction term | 1885.1     | 1974.5     | 51.04                      | 2             | <b>&lt;0.001</b> |
| <b>PIGF</b>     | Null model                  | 2603.1     | 2677.6     |                            |               |                  |
|                 | Model with malaria term     | 2603.6     | 2683.1     | 1.50                       | 1             | 0.221            |
|                 | Model with interaction term | 2602.2     | 2691.6     | 5.41                       | 2             | 0.067            |
| <b>sFlt-1</b>   | Null model                  | 1383.4     | 1458.0     |                            |               |                  |
|                 | Model with malaria term     | 1385.4     | 1464.9     | 0.063                      | 1             | 0.801            |
|                 | Model with interaction term | 1389.3     | 1478.7     | 0.051                      | 2             | 0.975            |
| <b>Angptl3</b>  | Null model                  | 2143.4     | 2218.0     |                            |               |                  |
|                 | Model with malaria term     | 2144.4     | 2224.0     | 0.93                       | 1             | 0.334            |
|                 | Model with interaction term | 2142.1     | 2231.6     | 6.37                       | 2             | <b>0.041</b>     |
| <b>Leptin</b>   | Null model                  | 2111.2     | 2185.7     |                            |               |                  |
|                 | Model with malaria term     | 2112.6     | 2192.1     | 0.59                       | 1             | 0.443            |
|                 | Model with interaction term | 2111.4     | 2200.8     | 5.17                       | 2             | 0.075            |
| <b>sICAM-1</b>  | Null model                  | 2749.4     | 2824.0     |                            |               |                  |
|                 | Model with malaria term     | 2749.8     | 2829.4     | 1.65                       | 1             | 0.199            |
|                 | Model with interaction term | 2743.9     | 2833.4     | 9.85                       | 2             | <b>0.007</b>     |
| <b>CRP</b>      | Null model                  | 3141.3     | 3213.9     |                            |               |                  |
|                 | Model with malaria term     | 3104.3     | 3181.8     | 39.01                      | 1             | <b>&lt;0.001</b> |
|                 | Model with interaction term | 3068.7     | 3155.9     | 39.57                      | 2             | <b>&lt;0.001</b> |
| <b>CHI3L1</b>   | Null model                  | 2531.3     | 2605.9     |                            |               |                  |
|                 | Model with malaria term     | 2533.3     | 2612.9     | 0.03                       | 1             | 0.867            |
|                 | Model with interaction term | 2529.9     | 2619.4     | 7.42                       | 2             | <b>0.024</b>     |
| <b>sTNFRII</b>  | Null model                  | 2166.5     | 2241.1     |                            |               |                  |
|                 | Model with malaria term     | 2137.8     | 2217.3     | 30.75                      | 1             | <b>&lt;0.001</b> |
|                 | Model with interaction term | 2052.5     | 2142.0     | 89.30                      | 2             | <b>&lt;0.001</b> |
| <b>IL-18BP</b>  | Null model                  | 1549.0     | 1623.5     |                            |               |                  |
|                 | Model with malaria term     | 1531.4     | 1610.9     | 19.57                      | 1             | <b>&lt;0.001</b> |
|                 | Model with interaction term | 1512.1     | 1601.6     | 23.29                      | 2             | <b>&lt;0.001</b> |
