# Supplementary material for: Early malaria infection, dysregulation of angiogenesis, metabolism and inflammation across pregnancy, and risk of preterm birth in Malawi: A cohort study
Source: PubMed Central journal article supplement (PMC6772002; doi:10.1371/journal.pmed.1002914), 2019-10-01
Supplement: pmed.1002914.s014.pdf [file pmed.1002914.s014.pdf]

**S12 Table.** Multivariate linear mixed effects modeling comparing the null model to the addition of malaria status at Visit 1 with an interaction term assessing gestational age, multigravids only.

| Mediator | Model                       | AIC    | BIC    | $\chi^2$ | Chi Df | P value          |
|----------|-----------------------------|--------|--------|----------|--------|------------------|
| sEng     | Null model                  | 2692.6 | 2777.2 |          |        |                  |
|          | Model with malaria term     | 2694.4 | 2784.6 | 0.23     | 1      | 0.628            |
|          | Model with interaction term | 2694.4 | 2795.8 | 4.05     | 2      | 0.132            |
| PIGF     | Null model                  | 4613.9 | 4698.4 |          |        |                  |
|          | Model with malaria term     | 4615.8 | 4706.0 | 0.09     | 1      | 0.768            |
|          | Model with interaction term | 4618.0 | 4719.4 | 1.84     | 2      | 0.399            |
| sFlt-1   | Null model                  | 2659.6 | 2744.1 |          |        |                  |
|          | Model with malaria term     | 2661.6 | 2751.8 | <0.01    | 1      | 0.947            |
|          | Model with interaction term | 2664.9 | 2766.4 | 0.62     | 2      | 0.733            |
| Angptl3  | Null model                  | 4376.8 | 4461.4 |          |        |                  |
|          | Model with malaria term     | 4378.7 | 4468.9 | 0.11     | 1      | 0.741            |
|          | Model with interaction term | 4372.6 | 4474.0 | 10.14    | 2      | <b>0.006</b>     |
| Leptin   | Null model                  | 3932.0 | 4016.6 |          |        |                  |
|          | Model with malaria term     | 3932.6 | 4022.8 | 1.47     | 1      | 0.226            |
|          | Model with interaction term | 3932.0 | 4033.5 | 4.53     | 2      | 0.104            |
| sICAM-1  | Null model                  | 5362.9 | 5447.5 |          |        |                  |
|          | Model with malaria term     | 5364.0 | 5454.2 | 0.86     | 1      | 0.354            |
|          | Model with interaction term | 5348.0 | 5449.5 | 20.04    | 2      | <b>&lt;0.001</b> |
| CRP      | Null model                  | 6243.5 | 6328.1 |          |        |                  |
|          | Model with malaria term     | 6230.4 | 6320.5 | 15.16    | 1      | <b>&lt;0.001</b> |
|          | Model with interaction term | 6188.2 | 6289.6 | 46.16    | 2      | <b>&lt;0.001</b> |
| CHI3L1   | Null model                  | 4762.5 | 4847.1 |          |        |                  |
|          | Model with malaria term     | 4764.5 | 4854.7 | <0.01    | 1      | 0.992            |
|          | Model with interaction term | 4756.0 | 4857.5 | 12.52    | 2      | <b>0.002</b>     |
| sTNFRII  | Null model                  | 3606.3 | 3690.9 |          |        |                  |
|          | Model with malaria term     | 3603.0 | 3693.2 | 5.31     | 1      | <b>0.021</b>     |
|          | Model with interaction term | 3527.2 | 3628.7 | 79.80    | 2      | <b>&lt;0.001</b> |
| IL-18BP  | Null model                  | 2727.9 | 2812.4 |          |        |                  |
|          | Model with malaria term     | 2713.9 | 2804.1 | 15.95    | 1      | <b>&lt;0.001</b> |
|          | Model with interaction term | 2704.0 | 2805.5 | 13.92    | 2      | <b>&lt;0.001</b> |
