# Supplementary material for: La unión metal-cerámica. Errores de tratamiento
Source: PLOS journal article supplement (doi:10.1371/journal.pmed.1002914), 2003-01-01
Supplement: S4 (10.1371/journal.pmed.1002914.s004) [file journal.pmed.1002914.s004]

**S2 Table.** Data available for each of the following variables and the percentage of missing data.

| <b>Variable</b>                                 | <b>Available data, n</b> | <b>Percentage missing, %</b> |
|-------------------------------------------------|--------------------------|------------------------------|
| For each visit (with associated plasma sample): |                          |                              |
| Malaria Status                                  |                          |                              |
| Visit 1                                         | 1456                     | 1.6                          |
| Visit 2                                         | 1051                     | 2.7                          |
| Visit 3                                         | 784                      | 4.2                          |
| For each woman:                                 |                          |                              |
| Malaria positive, peripheral blood at delivery  | 1391                     | 14.6                         |
| Malaria positive, placental blood               | 1315                     | 19.2                         |
| Placental histology                             | 1374                     | 15.6                         |
| Birth weight                                    | 1451                     | 10.9                         |
| Gestational age at delivery                     | 1536                     | 5.7                          |
| Type of Delivery (spontaneous vs C-section)     | 1535                     | 5.7                          |
| Delivery outcome (viable vs non-viable)         | 1544                     | 5.2                          |
